# Supplementary material for: Excess Mortality Among Patients in the Veterans Affairs Health System Compared With the Overall US Population During the First Year of the COVID-19 Pandemic
Source: PubMed Central journal article supplement (PMC10167568; doi:10.1001/jamanetworkopen.2023.12140), 2023-05-08
Supplement: jamanetwopen-e2312140-s002.pdf [file jamanetwopen-e2312140-s002.pdf]

## Data Sharing Statement

Weinberger. Excess Mortality Among Patients in the Veterans Affairs Health System Compared With the Overall US Population During the First Year of the COVID-19 Pandemic. *JAMA Netw Open*. Published May 08, 2023. doi:10.1001/jamanetworkopen.2023.12140

### Data

**Data available:** No

### Additional Information

**Explanation for why data not available:** Data on US mortality, with the exception of state/region, can be obtained from [https://www.cdc.gov/nchs/nvss/mortality\\_public\\_use\\_data.htm](https://www.cdc.gov/nchs/nvss/mortality_public_use_data.htm). For additional variables, including geography, a data use agreement with NCHS is required. VA data and the analytic data sets used for this study can be made available to researchers with a VA IRB approved study protocol and data use agreement. Information is available at <https://www.virec.research.va.gov> or contact the VA Information Resource Center at [VIReC@va.gov](mailto:VIReC@va.gov).
